# Supplementary material
Source: PubMed Central journal article supplement (PMC3366840)
Supplement: supp_M111.329649_jbc.M111.329649-1.pdf [file supp_M111.329649_jbc.M111.329649-1.pdf]

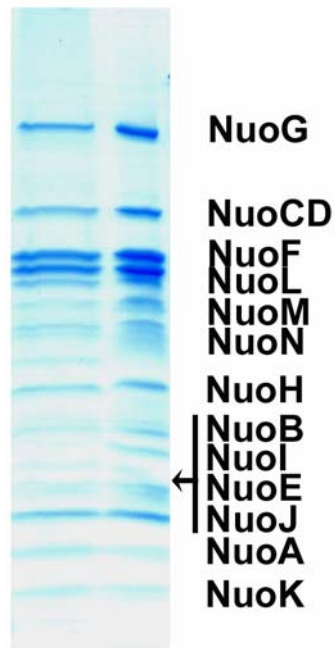

**Supplemental Figure 1. Purification of complex I from *E. coli*.** Coomassie Blue-stained SDS-PAGE gel from a sample of purified *E. coli* complex I
