# Supplementary material
Source: PubMed Central journal article supplement (PMC3366840)
Supplement: supp_M111.329649_jbc.M111.329649-4.pdf [file supp_M111.329649_jbc.M111.329649-4.pdf]

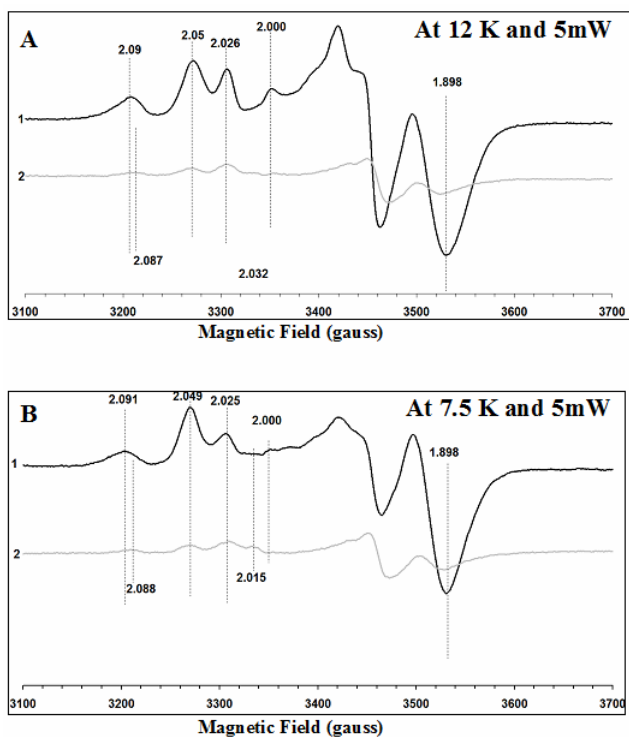

**Supplemental Figure 4. EPR spectra of the purified *E. coli* complex I from wild type and Nuol mutant E107A.** The **top panel (A)** shows the comparison of EPR spectra of WT (1), and E107A (2) at 12 K, while the **lower panel (B)** shows the EPR spectra at 7.5 K. The samples were reduced with 10 mM sodium dithionite in the presence of 5  $\mu$ M of benzyl viologen and methyl viologen. The EPR conditions used were the same as those in Figure 6. The  $g_z$  and  $g_x$  values are indicated.
