# Supplementary material
Source: PubMed Central journal article supplement (PMC3366840)
Supplement: supp_M111.329649_jbc.M111.329649-5.pdf [file supp_M111.329649_jbc.M111.329649-5.pdf]

**Supplemental Table 1: Primers used for the mutagenesis of *E. coli nuoI* Gene.** The underlined bases were altered from *E. coli* DNA.

C60A : 5'-GGACGGCGAAGAGCGTGCCGTAGCCTGTAACCTCTGCGC-3'  
 C60S : 5'-GACGGCGAAGAGCGTTCCGTAGCCTGTAACCTCTG-3'  
 C60H : 5'-GGACGGCGAAGAGCGTCACGTAGCCTGTAACCTCTGCGC-3'  
 C63A : 5'-CGAAGAGCGTTGCGTAGCCGCTAACCTCTGCGCGGTAGCCTG-3'  
 C63S : 5'-GAAGAGCGTTGCGTAGCCTCTAACCTCTGCGCGGTAG-3'  
 C66S : 5'-GCGTAGCCTGTAACCTCTCCGCGGTAGCCTGC-3'  
 C66H : 5'-GCGTAGCCTGTAACCTCCACGCGGTAGCCTGC-3'  
 C70S : 5'-CTGTAACCTCTGCGCGGTAGCCTCCCCGGTCGGC-3'  
 C70H : 5'-GTAACCTCTGCGCGGTAGCCCACCCGTCTGGTCTGATCTCG-3'  
 C99S : 5'-CGCATCAACTTCTCACGCAGCATTTTTCTGTGGTCTGTGCG-3'  
 C99H : 5'-GCATCAACTTCTCACGCCACATTTTTCTGTGGTCTGTGCG-3'  
 C102S : 5'-CTCACGCTGCATTTTTCAGTTGGTCTGTGCGAAGAAGCCTG-3'  
 C102H : 5'-CACGCTGCATTTTTCCATGTTGGTCTGTGCGAAGAAGC-3'  
 C105S : 5'-CTGTGGTCTGAGCGAAGAAGCCTGTCCGACCACGG-3'  
 C109S : 5'-GTGGTCTGTGCGAAGAAGCCAGTCCGACCACGGCG-3'  
 T30A : 5'-CGCGTTCGCCAAACGCGAAGCGCGAATGTACCCGGAAGAGC-3'  
 P34A : 5'-GCGAAACGCGAATGTACCGCGGAAGAGCCGGTCTATC-3'  
 P42A : 5'-GAGCCGGTCTATCTGCCGGCCCGTTATCGTGGTCTGATCG-3'  
 R43A : 5'-GGTCTATCTGCCGCCCGCTTATCGTGGTCTGATCGTTCTG-3'  
 Y44A : 5'-GGTCTATCTGCCGCCCGTGCTCGTGGTCTGATCGTTCTG-3'  
 G46A : 5'-CTGCCGCCCGTTATCGTGCTCGTATCGTTCTGACC-3'  
 R52A : 5'-GTGGTCTGATCGTTCTGACCGCCGACCCGGACGGCG-3'  
 P54A : 5'-CGTATCGTTCTGACCCGCGACCGGACGGCGAAGAGCGTTGC-3'  
 G56A : 5'-CGTTCTGACCCGCGACCCGGACCGCCGAAGAGCGTTGCGTAG-3'  
 E58A : 5'-GACCCGCGACGGCGAAGCGCGTTGCGTAGCCTGTAACC-3'  
 V61A : 5'-CGAAGAGCGTTGCGCAGCCTGTAACCTCTGCG-3'  
 L65A : 5'-GCGTAGCCTGTAACCCTGCGCGGTAGCCTGCCCGGTCTG-3'  
 P71A : 5'-CTGCGCGGTAGCCTGCGCGGTCTGGTGTATCTCGC-3'  
 I75A : 5'-GCCTGCCCGGTCTGGCTGTGCCTCGCTGCAAAAAGCAG-3'  
 G85A : 5'-GCAGAAACCAAAGACGCTCGCTGGTACCCGGAATTTTCCGCATC-3'  
 F92A : 5'-GACGGTCTGCTGGTACCCGGAATTTGCCCGCATCAACTTCTCACG-3'  
 R93A : 5'-GCTGGTACCCGGAATTTTTCGCATCAACTTCTCACGCTGC-3'  
 I94A : 5'-CGCTGGTACCCGGAATTTTCCGCGCAACTTCTCACGCTGC-3'  
 I94G : 5'-CGCTGGTACCCGGAATTTTCCGCGGCAACTTCTCACGCTGC-3'  
 R98A : 5'-TCCGCATCAACTTCTCAGCCTGCATTTTCTGTGGTCTGTGC-3'  
 I100A : 5'-CCGCATCAACTTCTCACGCTGCGCTTTCTGTGGTCTGTGCG-3'  
 I100G : 5'-CCGCATCAACTTCTCACGCTGCATTTTCTGTGGTCTGTGCG-3'  
 G103A : 5'-CACGCTGCATTTTTCTGTGCTCTGTGCGAAGAAGCCTGTCC-3'  
 E107A : 5'-GTGGTCTGTGCGAAGCAGCCTGTCCGACCACGGCG-3'  
 P110A : 5'-GGTCTGTGCGAAGAAGCCTGTGCGACCACGGCGATTTCAG-3'  
 I114A : 5'-CCTGTCCGACCACGGCGGCTCAGTTAACCCCGGATTTCG-3'  
 E121A : 5'-CCCGATTTCGCAATGGGGGAATACAAGCGCCAGG-3'  
 Y132A : 5'-CAAGCGCCAGGATCTGTTGCCGAGAAAGAGGATCTGCTG-3'
