# Supplementary material
Source: PubMed Central journal article supplement (PMC3366840)
Supplement: supp_M111.329649_jbc.M111.329649-6.pdf [file supp_M111.329649_jbc.M111.329649-6.pdf]

**Supplemental Table 2:** Purification of NDH-1 complex from *E. coli* MC4100.

| Purification step     | Vol (ml) | Protein (mg) | Total activity ( $\mu\text{mol min}^{-1}$ ) | Specific activity ( $\mu\text{mol min}^{-1} \text{mg}^{-1}$ ) |
|-----------------------|----------|--------------|---------------------------------------------|---------------------------------------------------------------|
| Membrane fraction     | 40       | 1228         | 959                                         | 0.8                                                           |
| Solubilized membranes | 35       | 728          | 613                                         | 0.8                                                           |
| Q-Sepharose           | 15       | 80           | 144                                         | 1.8                                                           |
| DEAE                  | 3        | 21           | 122                                         | 5.9                                                           |
| Superdex 200          | 1.4      | 1.8          | 44                                          | 24.8                                                          |
