# Supplementary material
Source: PubMed Central journal article supplement (PMC3366840)
Supplement: supp_M111.329649_jbc.M111.329649-7.pdf [file supp_M111.329649_jbc.M111.329649-7.pdf]

**Supplemental Table 3. Effects of NuoI mutations on production of superoxide radicals coupled to dNADH oxidase<sup>a</sup>.**

| Sample                | ROS Production <sup>b</sup> |
|-----------------------|-----------------------------|
| WT                    | 0.015 (100%)                |
| WT-Cap40 <sup>c</sup> | 0.079 (527%)                |
| C60S                  | 0.049 (325%)                |
| C63A                  | 0.085 (567%)                |
| C63S                  | 0.045 (300%)                |
| C70H                  | 0.096 (640%)                |
| C102S                 | 0.094 (627%)                |
| P42A                  | 0.014 (93%)                 |
| R43A                  | 0.019 (127%)                |
| V61A                  | 0.060 (401%)                |
| L65A                  | 0.035 (233%)                |
| P71A                  | 0.035 (233%)                |
| I75A                  | 0.079 (527%)                |
| G85A                  | 0.02 (133%)                 |
| I94G                  | 0.013 (89%)                 |
| R98A                  | 0.045 (297%)                |
| I100G                 | 0.012 (81%)                 |
| E107A                 | 0.05 (333%)                 |
| P110A                 | 0.078 (520%)                |

<sup>a</sup>The production of superoxide radicals was detected by reduction of SOD-sensitive acetylated cytochrome *c*. Five  $\mu\text{M}$  of acetylated cytochrome *c* was used as a reporter at 550 nm for this purpose. NuoI membrane samples at 0.24 mg protein/ml in 10 mM potassium phosphate buffer (pH 7) were used and 0.15 mM dNADH was added to the reaction mixture to start the reaction.

<sup>b</sup> nmol reduced AcetCytC/min/mg.

<sup>c</sup>WT-Cap40, wild type in the presence of 10  $\mu\text{M}$  Cap-40.
